# Supplementary material
Source: Springer Nature journal article supplement (https://www.springermedizin.de/resource/supplementary/12904_2013_213_MOESM7_ESM.docx/9517780)
Supplement: MOESM7 [file 9517780]

**Fig 3 Lowest Post-Course Confidence Levels for Individual Items (SHA Confidence Questionnaire Items)**

**Key: ACP2** Uses documentation, whether paper or electronic, appropriately to access inform and record end of life care planning and delivery succinctly and legibly as per NMC Guidance (NMC 2008)

**ACP3** Is involved in advance care planning as an on-going process,

**ACP5** Identifies the principals of the Gold Standards Framework and works with colleagues and patients to deliver care in this framework

**ACP4** Can state their understanding of different elements of Advance care planning: Advance Statement; Advance decision to refuse treatment (ADRT); Best Interests; Lasting power of attorney; Finance and welfare; Informed consent.

**ACP6** Contributes to the team’s assessment in recognising the dying phase and works with colleagues, patients and relatives to introduce the Liverpool Care Pathway.
